# Supplementary material for: Cytological analysis of tracheal wash and bronchoalveolar lavage fluid in health and respiratory disease in dromedary camels
Source: PeerJ. 2021 Jul 2;9:e11723. doi: 10.7717/peerj.11723 (PMC8256809; doi:10.7717/peerj.11723)
Supplement: Supplemental Information 1 [file peerj-09-11723-s001.xlsx]

## Sheet: Sheet1
Animal Nr	Status	Sex	Age	Breed	Clincal Score points
1	Healthy	Male	12	Majaheem	1
2	Healthy	Male	13	Omani	0
3	Healthy	Female	8	Makhateer	2
4	Healthy	Female	7	Majaheem	0
5	Healthy	Female	15	Majaheem	0
6	Healthy	Male	12	Majaheem	1
7	Healthy	Male	11	Omani	2
8	Healthy	Female	8	Majaheem	1
9	Healthy	Male	7	Makhateer	0
10	Affected	Female	8	Omani	6
11	Affected	Female	5	Omani	6
12	Affected	Female	12	Majaheem	11
13	Affected	Male	13	Majaheem	3
14	Affected	Female	15	Majaheem	9
15	Affected	Male	8	Makhateer	5
16	Affected	Female	17	Makhateer	7
17	Affected	Female	11	Majaheem	8
18	Affected	Female	7	Majaheem	13
19	Affected	Female	6	Makhateer	7
20	Affected	Female	14	Makhateer	9
21	Affected	Male	15	Makhateer	7
22	Affected	Male	12	Omani	12
23	Affected	Female	14	Omani	3
24	Affected	Male	13	Majaheem	11
25	Affected	Female	18	Majaheem	6
26	Affected	Male	12	Makhateer	12
27	Affected	Male	15	Majaheem	8
