# Supplementary material for: Cytological analysis of tracheal wash and bronchoalveolar lavage fluid in health and respiratory disease in dromedary camels
Source: PeerJ. 2021 Jul 2;9:e11723. doi: 10.7717/peerj.11723 (PMC8256809; doi:10.7717/peerj.11723)
Supplement: Supplemental Information 2 [file peerj-09-11723-s002.xlsx]

## Sheet: Clinical Score
Animal Nr	Status	Clincal Score points (Total)	Score points (Cough Non) 0	Score points (Cough Rare) 1	Score points (Cough Non)Daily repeated 2	Score points (CoughSpontaneous during clinical examination ) 3	Dyspnoea (No difficulty in respiration ) 0	Dyspnoea (Mild visible increase ) 1	Dyspnoea (A clear abdominal movement ) 2	Dyspnoea (A difficult abdominal breathing ) 3	Dyspnoea (High degree of respiratory distress ) 4	Lung auscultation (Physiological) 0	Lung auscultation (Mild degree ) 1	Lung auscultation (Exaggerated inspiratory ) 2	Lung auscultation (Roughness in both ) 3	Lung auscultation (“Wheezes, Crackles” and) 4	Rectal temperature (<36.5) 0	Rectal temperature (36.7-39) 1	Rectal temperature (39.1-40) 2	Rectal temperature (>40.1) 3
1	Healthy	1	x				x						x				x
2	Healthy	0	x				x					x					x
3	Healthy	2		x			x						x				x
4	Healthy	0	x				x					x					x
5	Healthy	0	x				x					x					x
6	Healthy	1	x				x						x				x
7	Healthy	2		x			x						x				x
8	Healthy	1	x					x				x					x
9	Healthy	0	x				x					x					x
10	Affected	6			x			x						x				x
11	Affected	6		x				x							x			x
12	Affected	11				x				x						x		x
13	Affected	3		x				x					x				x
14	Affected	9			x					x					x			x
15	Affected	5		x					x					x			x
16	Affected	7				x			x					x			x
17	Affected	8				x			x					x				x
18	Affected	13				x					x					x			x
19	Affected	7			x			x						x				x
20	Affected	9				x				x					x		x
21	Affected	7			x			x						x					x
22	Affected	12				x				x						x			x
23	Affected	3	x					x						x			x
24	Affected	11				x			x							x			x
25	Affected	6		x					x						x		x
26	Affected	12			x					x						x				x
27	Affected	8		x					x						x				x
