# Supplementary material for: Cytological analysis of tracheal wash and bronchoalveolar lavage fluid in health and respiratory disease in dromedary camels
Source: PeerJ. 2021 Jul 2;9:e11723. doi: 10.7717/peerj.11723 (PMC8256809; doi:10.7717/peerj.11723)
Supplement: Supplemental Information 3 [file peerj-09-11723-s003.xlsx]

## Sheet: Sheet1
Animal Nr	Status	TW Macrophages %	TW Lymphocytes %	TW Neutrophils %	TW Mast cells %	TW Eosonophils %	TW Epithelia cells %	BAL Macrophages %	BAL Lymphocytes %	BAL Neutrophils %	BAL Mast cells %	BAL Eosonophils %	BAL Epithelia cells %			BAL Total cell counts
1	Healthy	65	4	24	0	1	5	55	24	10	2	1	7			80
2	Healthy	72	11	12	1	1	3	71	23	3	2	0	1			60
3	Healthy	59	10	18	0	2	9	55	14	19	1	4	5			375
4	Healthy	32	9	54	2	1	2	59	35	2.5	2	0.5	1			115
5	Healthy	22	11	28	2	3	29	57	24	10	2	1	6			60
6	Healthy	60	4	25	0	2	8	75	21	2	0	0	1			380
7	Healthy	56	10	12	2	2	10	64	21	7	0	0	6			440
8	Healthy	49	6	18	2	3	12	60	20	6.5	1.5	0	11			140
9	Healthy	48	9	38	2	1	2	46	27	12	2	2	11			154
10	Affected	45	1	51	2	0	1	55	21	16	0	2	6			800
11	Affected	20	7	80	0.8	0.4	0	51	14	20	3	5	7			950
12	Affected	25	4	67	2	0	2	37	19	36	2	1	5			2250
13	Affected	6	2	87	2	2	1	66	1	32	0	0	1			280
14	Affected	6	1	86	3	2	2	66	4.8	19.2	0	3	7			1200
15	Affected	45	1	51.5	1	0.5	1	58	22	12	0	2	6			475
16	Affected	21	7	80	0	0.4	0	48	12	27	3	4	6			645
17	Affected	29.5	5	63.5	0	0	2	41	35	17	2	1	4			890
19	Affected	6	1	88	3	0	2	66	4.8	19.7	0	2.5	7			790
20	Affected	44	1	53	1	0	1	56	22	14	0	2	6			1200
23	Affected	6	2	87	2	2	1	49	34	9	2	1	5			260
25	Affected	44.5	1	52.5	1	0	1	56	20	16	0	2	6			795
Temperature >39.1
18	Affected	6	2	87	2	2	1	49	1	49	0	0	1			2400
21	Affected	21.8	7	80	0.8	0.4	0	43	15	26	3	6	7			815
22	Affected	19	4	75	0	0	2	65.5	2	31.5	0	0	1			1800
24	Affected	6	1	88	3	0	2	56	5	30	0	2	7			1750
26	Affected	20.8	6	81	0.8	0.4	1	37	12	35	3	5	8			2000
27	Affected	31	5	62	0	0	2	41	35	17	2	1	4			1150
